# Supplementary material for: Defining the Sensitivity Landscape of 74,389 EGFR Variants to Tyrosine Kinase Inhibitors
Source: Research Square preprint supplement (doi:10.21203/rs.3.rs-847350/v1), 2021-09-01
Supplement: Supplementary file 1 [file d8f503ead0af8d89099ebd1c.docx]

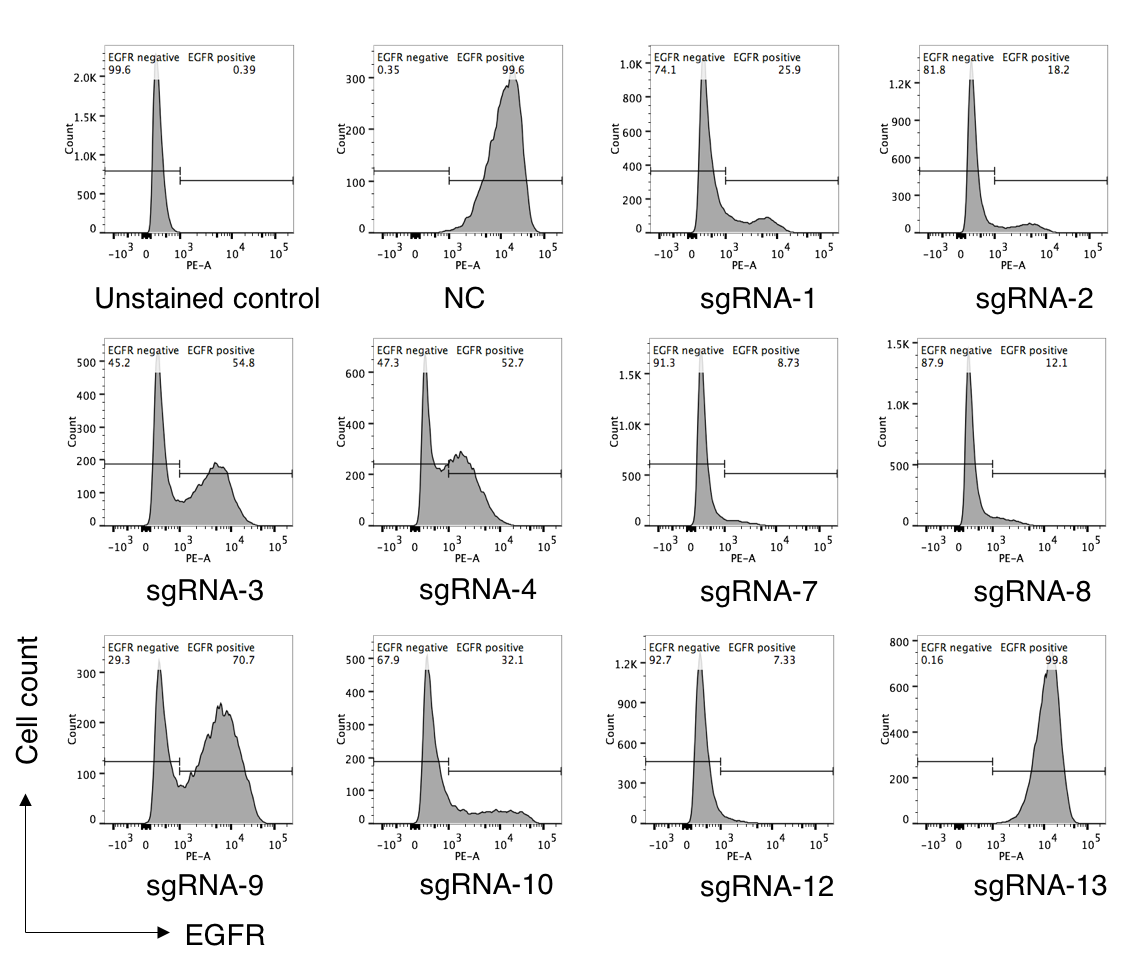


**Figure S4. Deletion of endogenous EGFR were determined by Fluorescence-Activated Cell Sorting (FACS) analysis.** The ten sgRNA lentiviruses were separately introduced into A549 cells and then selected with puromycin. Cells were harvested, immunostained with Anti-EGFR PE antibody (BioLegend) and subject to FACS analysis. All live cells were gated, and the proportion of EGFR (PE) positive cells was counted. NC stands for negative control.
